# Supplementary figures and images for: Flexible and efficient simulation-based inference for models of decision-making
Source: eLife journal article supplement (doi:10.7554/elife.77220), 2022-07-27

**a**

DDM simulator  
MNLE emulator

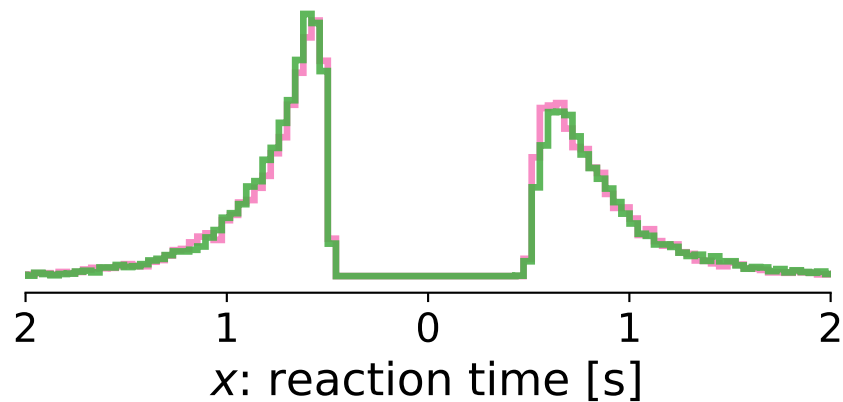**b**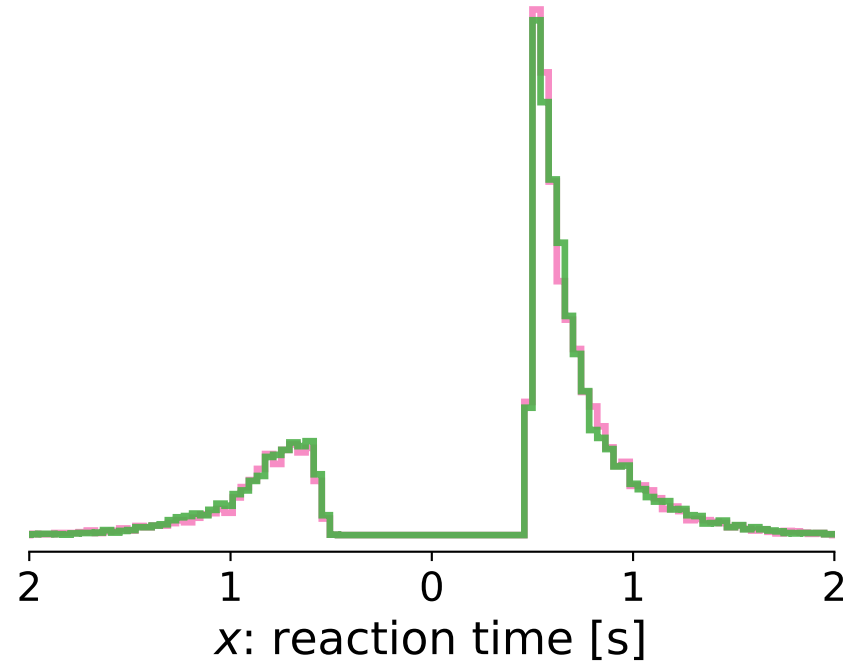**c**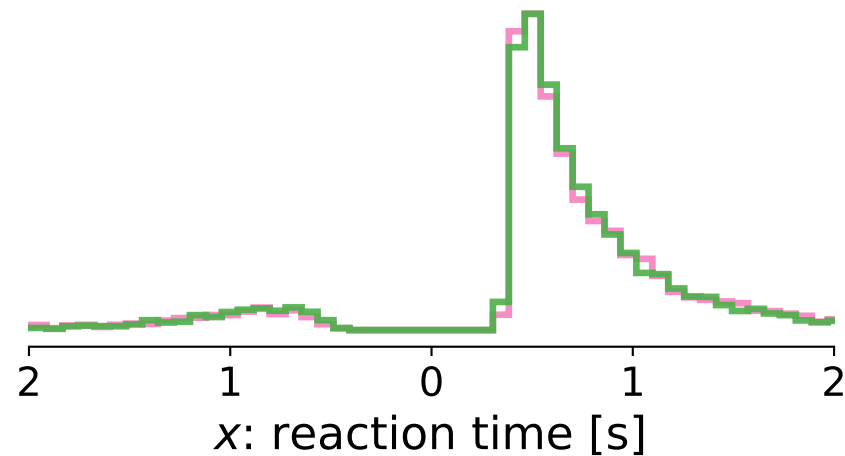

Supplement: supp [file elife_poa_e77220_Figure_2_figure_supplement_1.pdf › elife_poa_e77220_Figure_2_figure_supplement_1.pdf]

**a**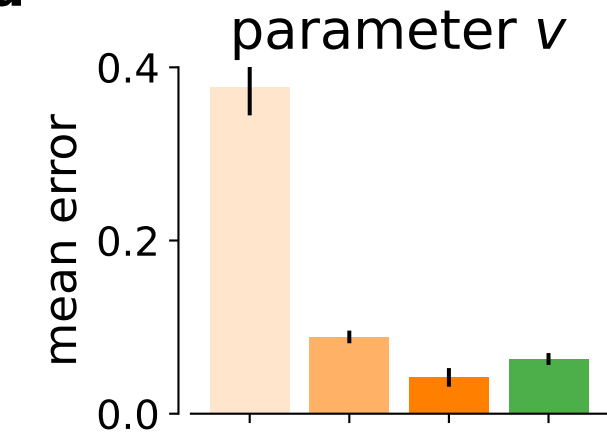**b**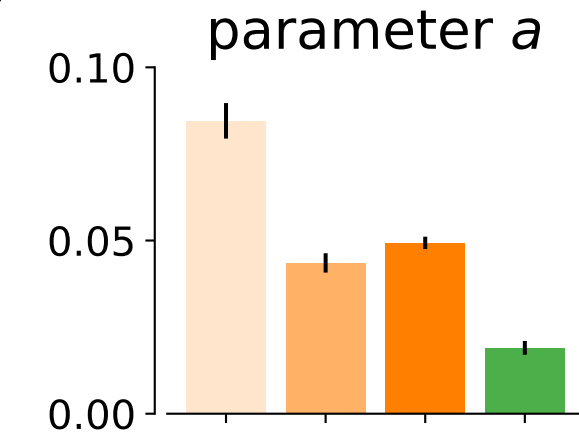**c**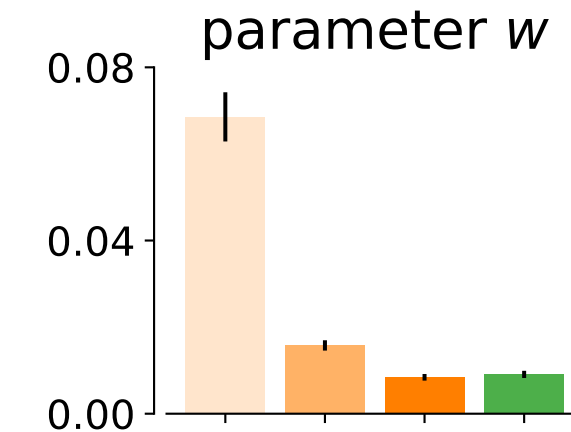**d**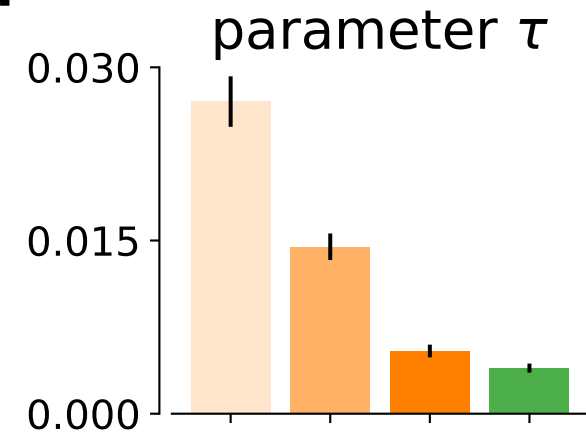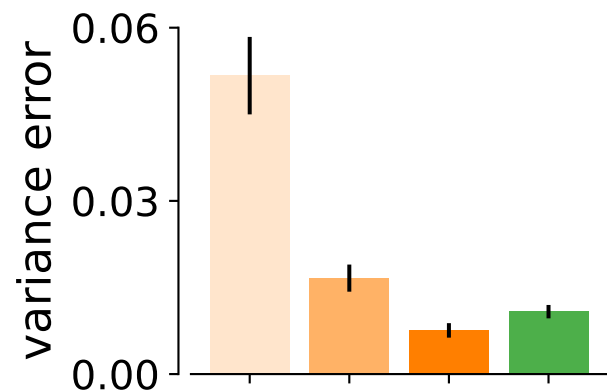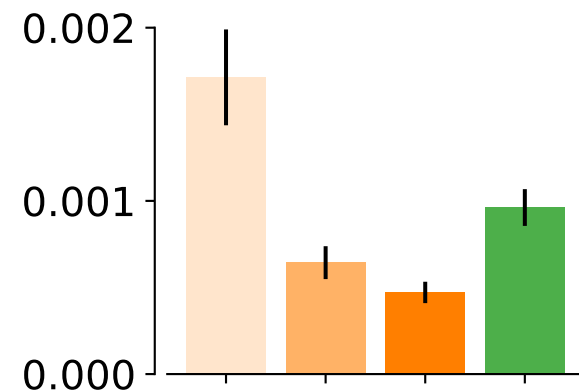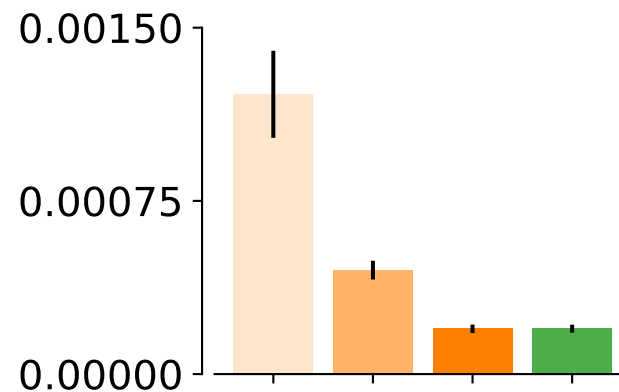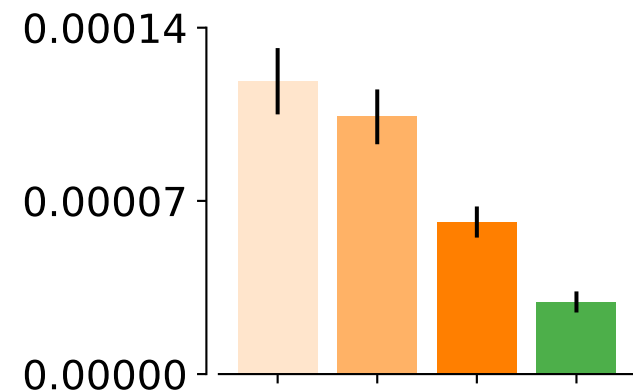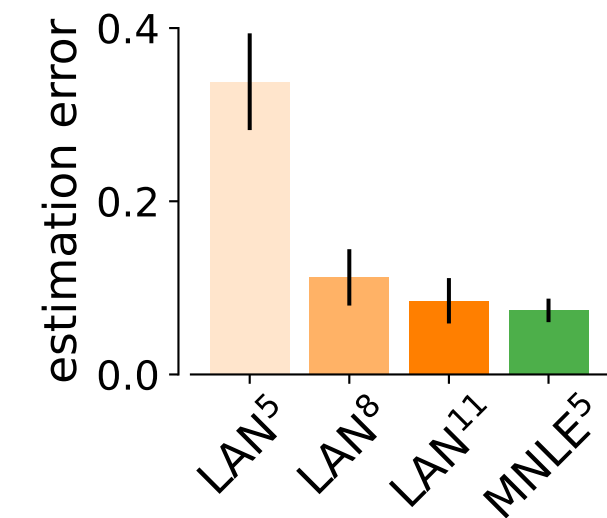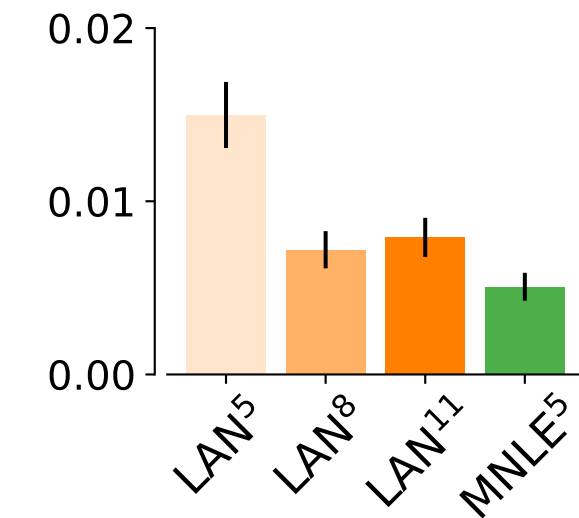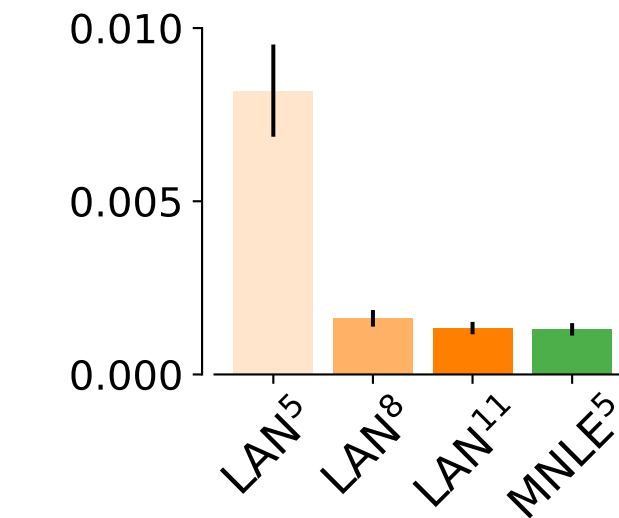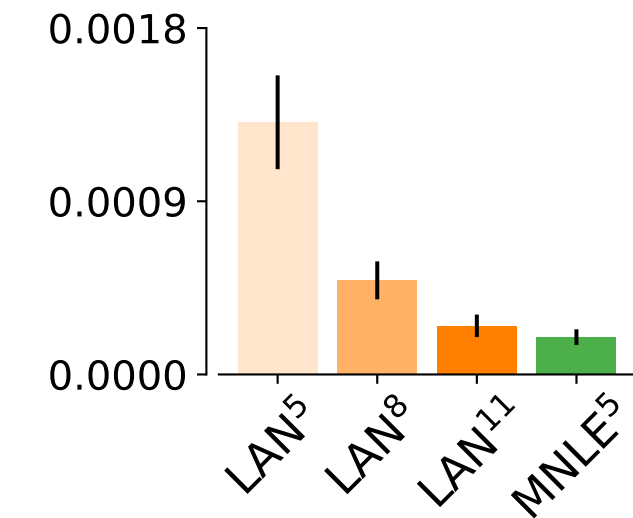

Supplement: supp [file elife_poa_e77220_Figure_3_figure_supplement_1.pdf › elife_poa_e77220_Figure_3_figure_supplement_1.pdf]

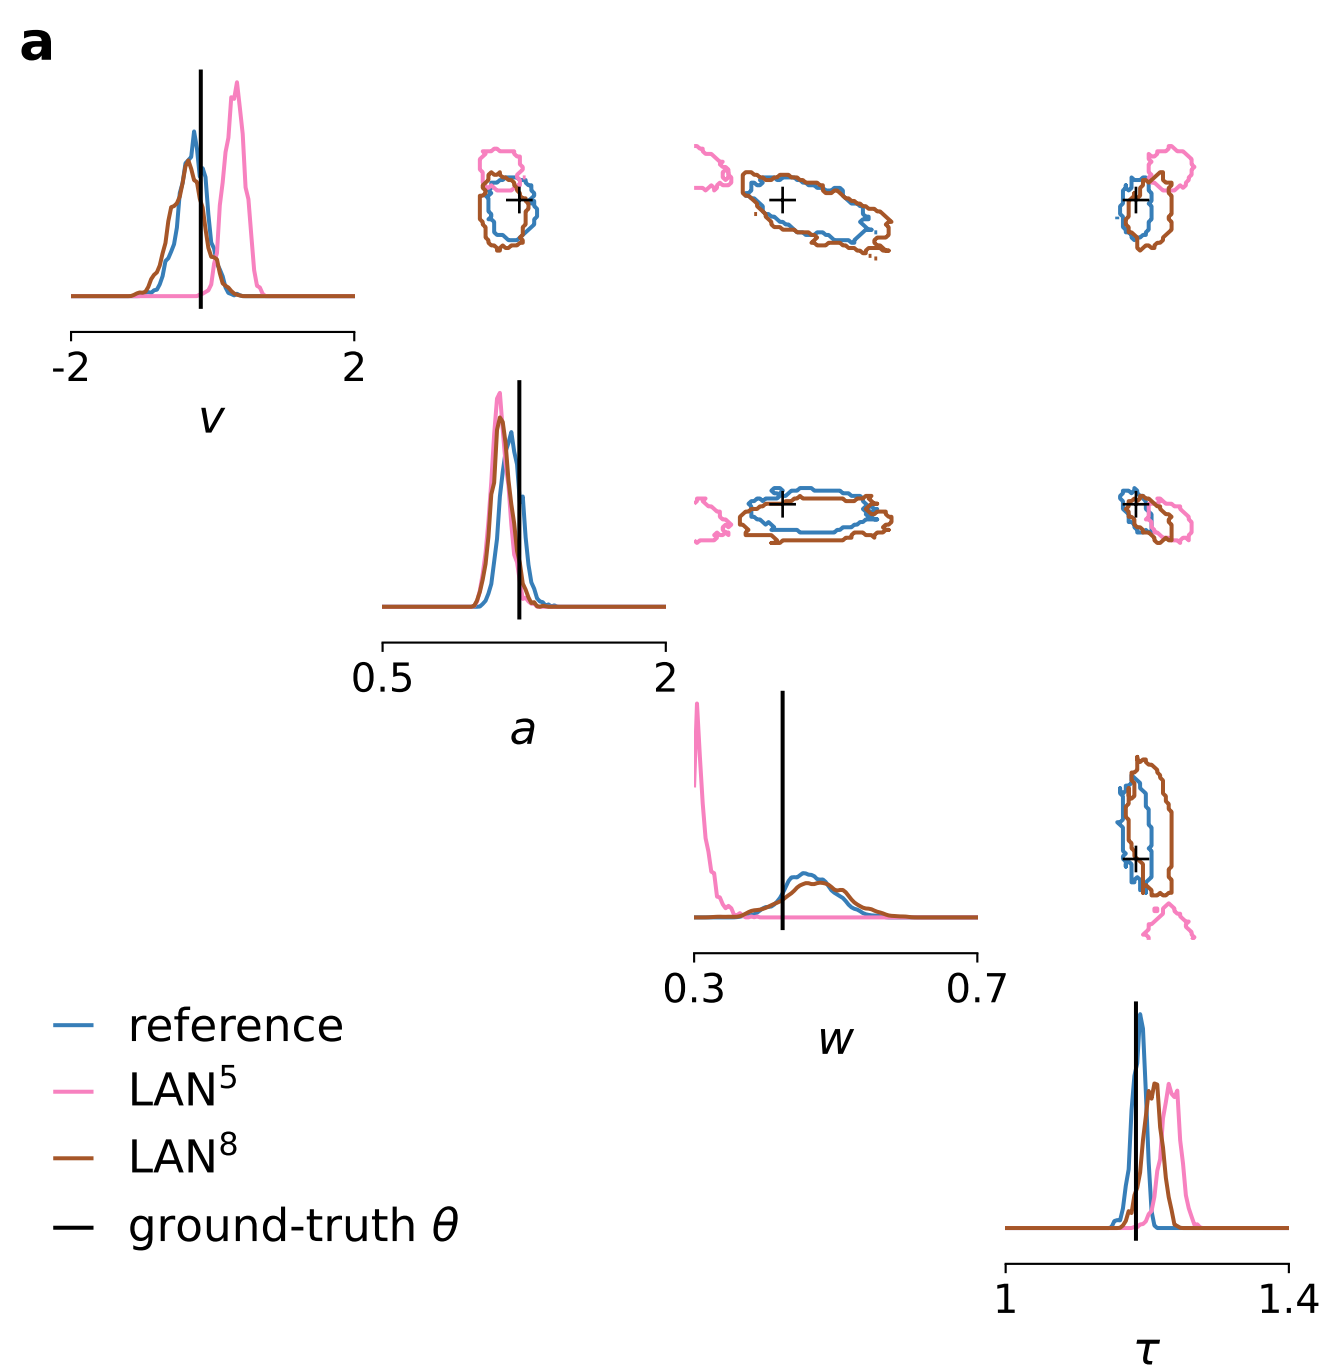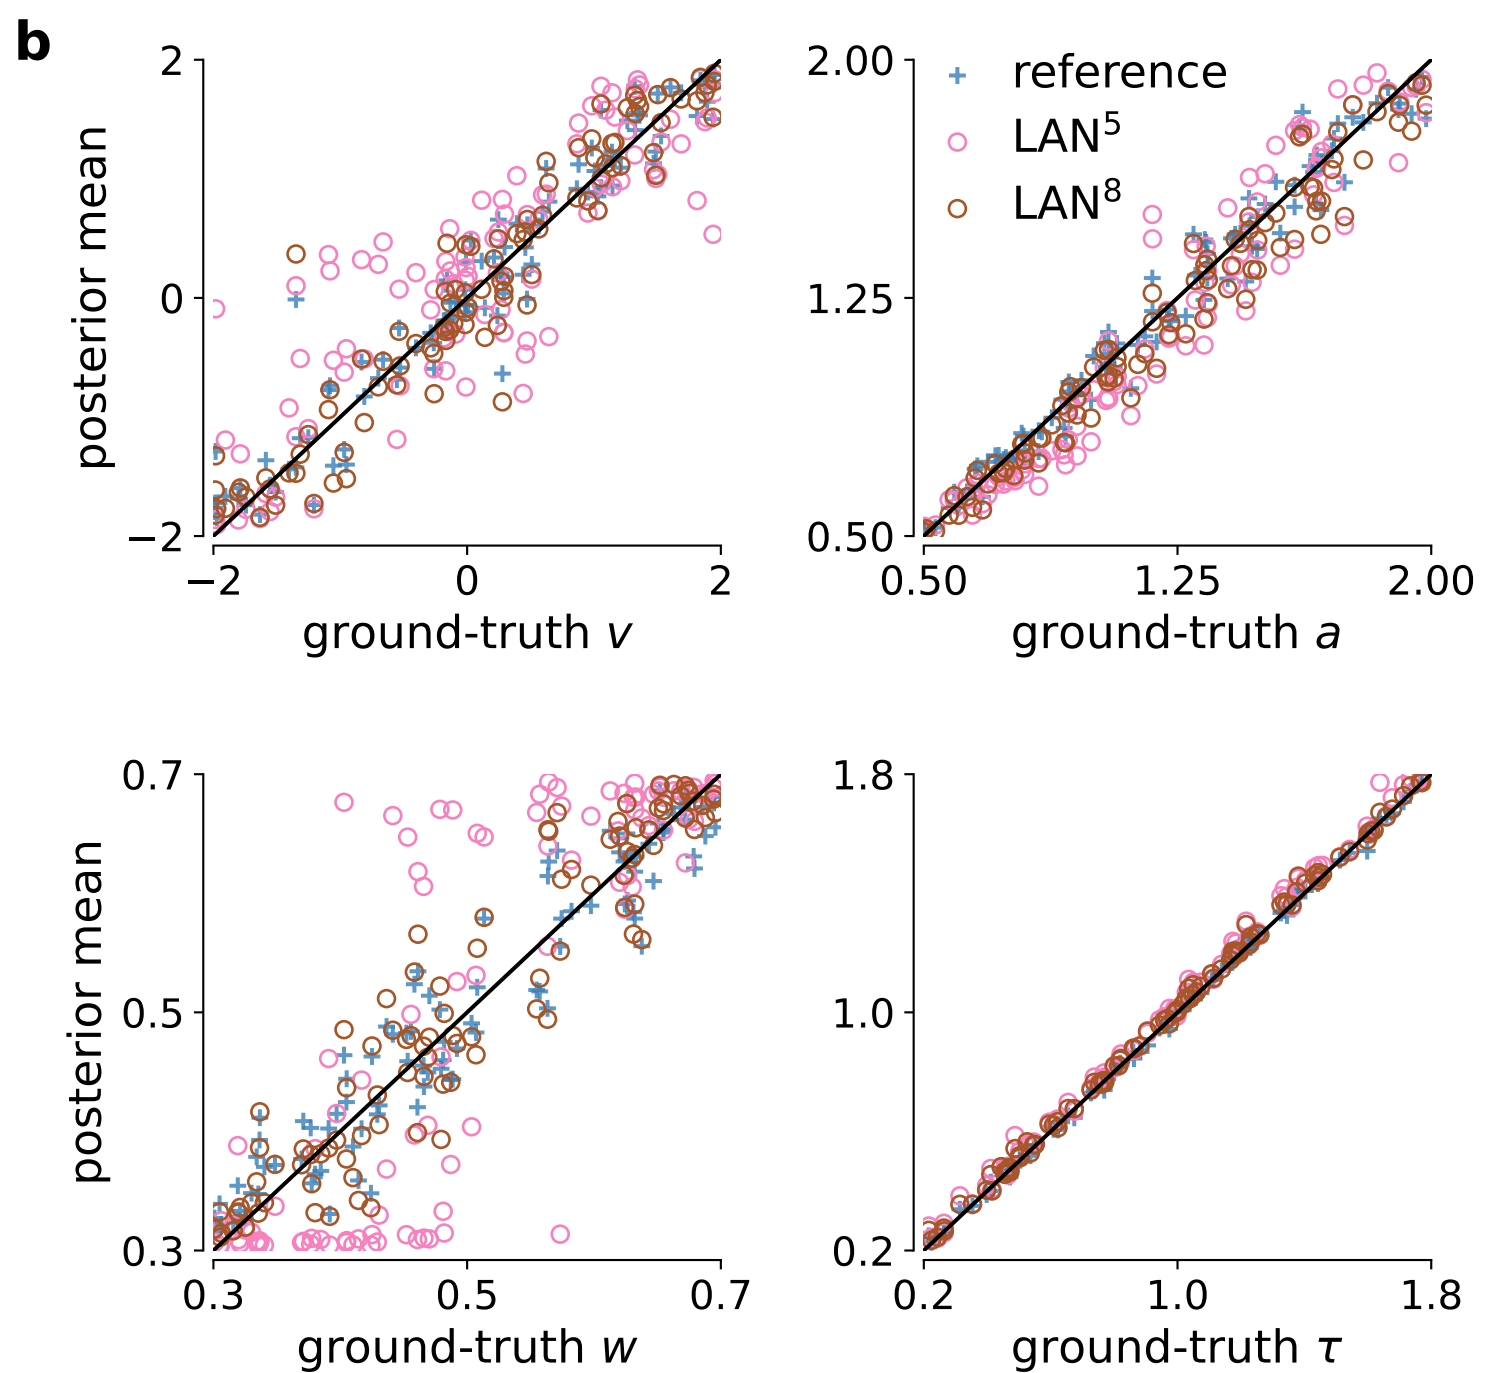

Supplement: supp [file elife_poa_e77220_Figure_3_figure_supplement_2.pdf › elife_poa_e77220_Figure_3_figure_supplement_2.pdf]

**a**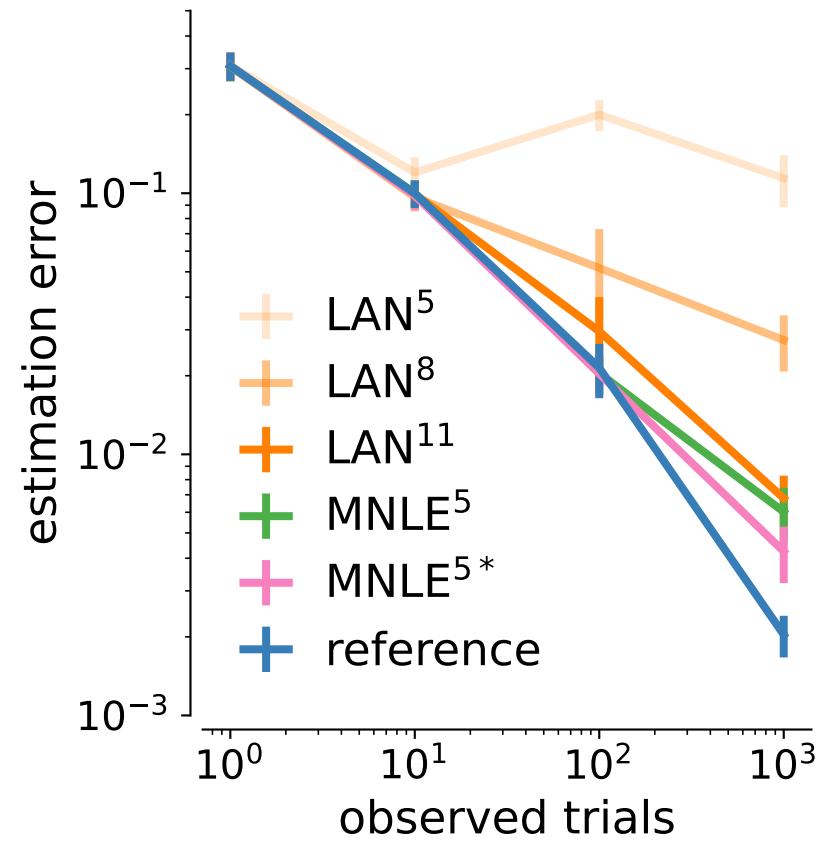**b**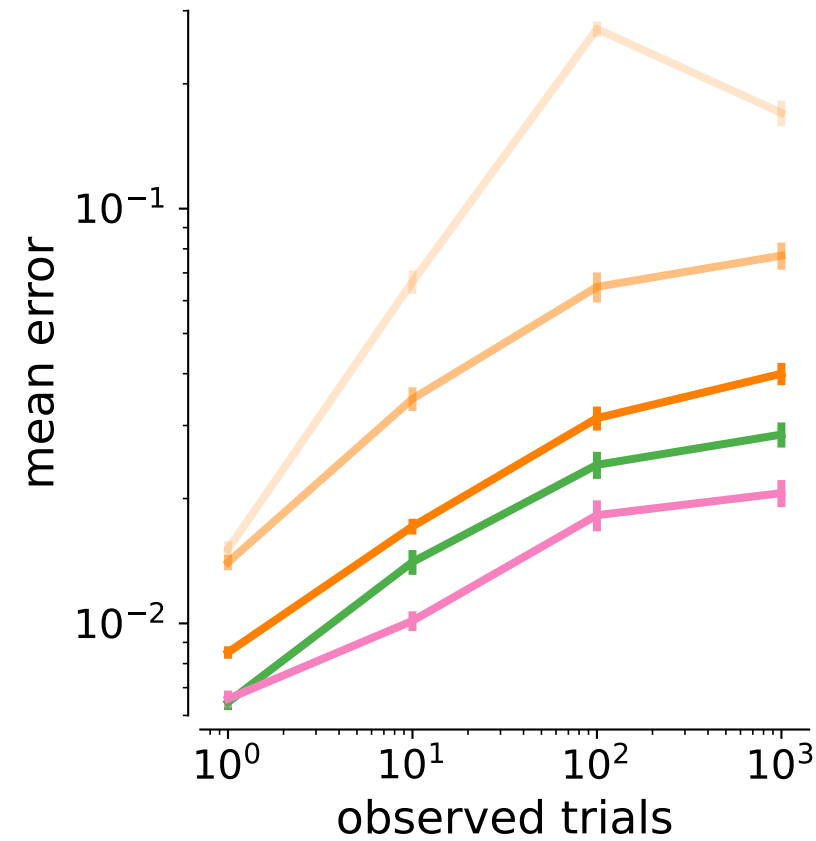**c**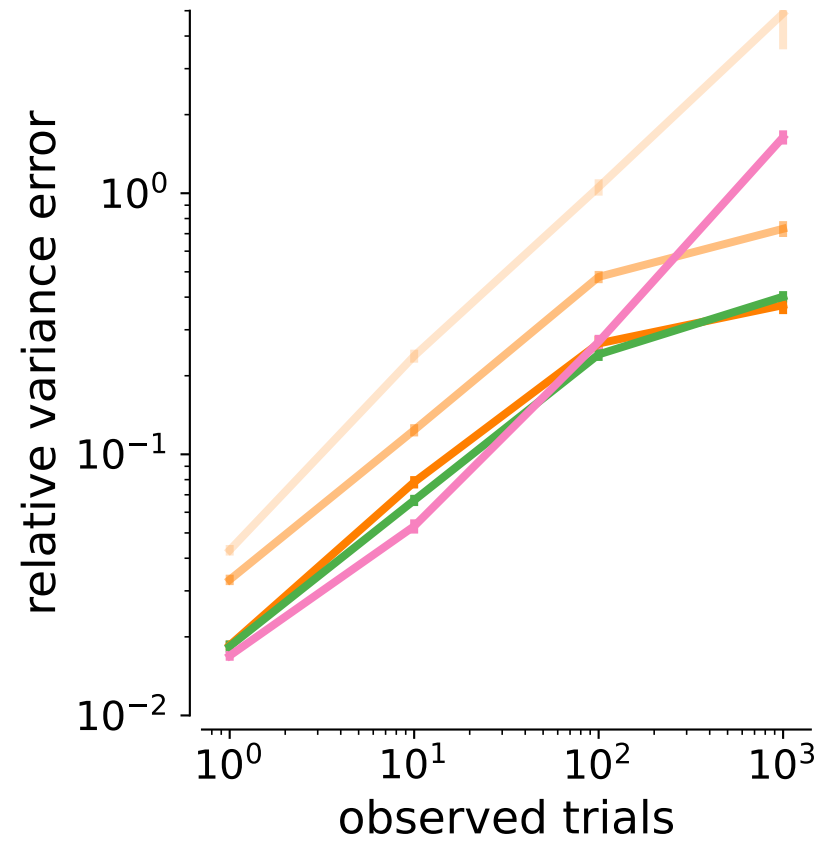**d**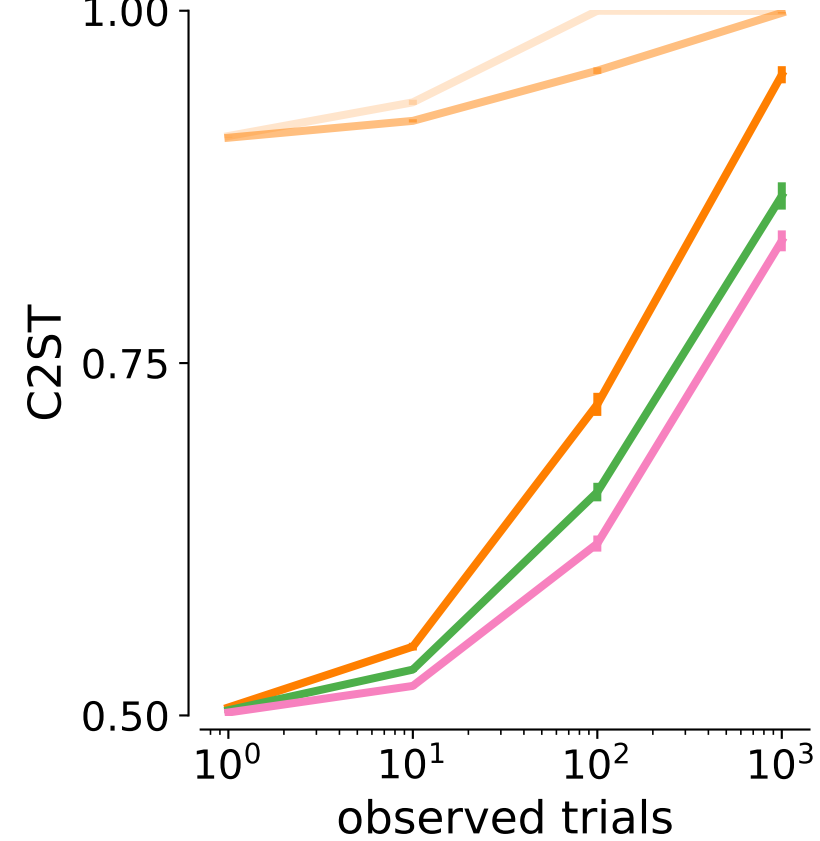

Supplement: supp [file elife_poa_e77220_Figure_3_figure_supplement_3.pdf › elife_poa_e77220_Figure_3_figure_supplement_3.pdf]

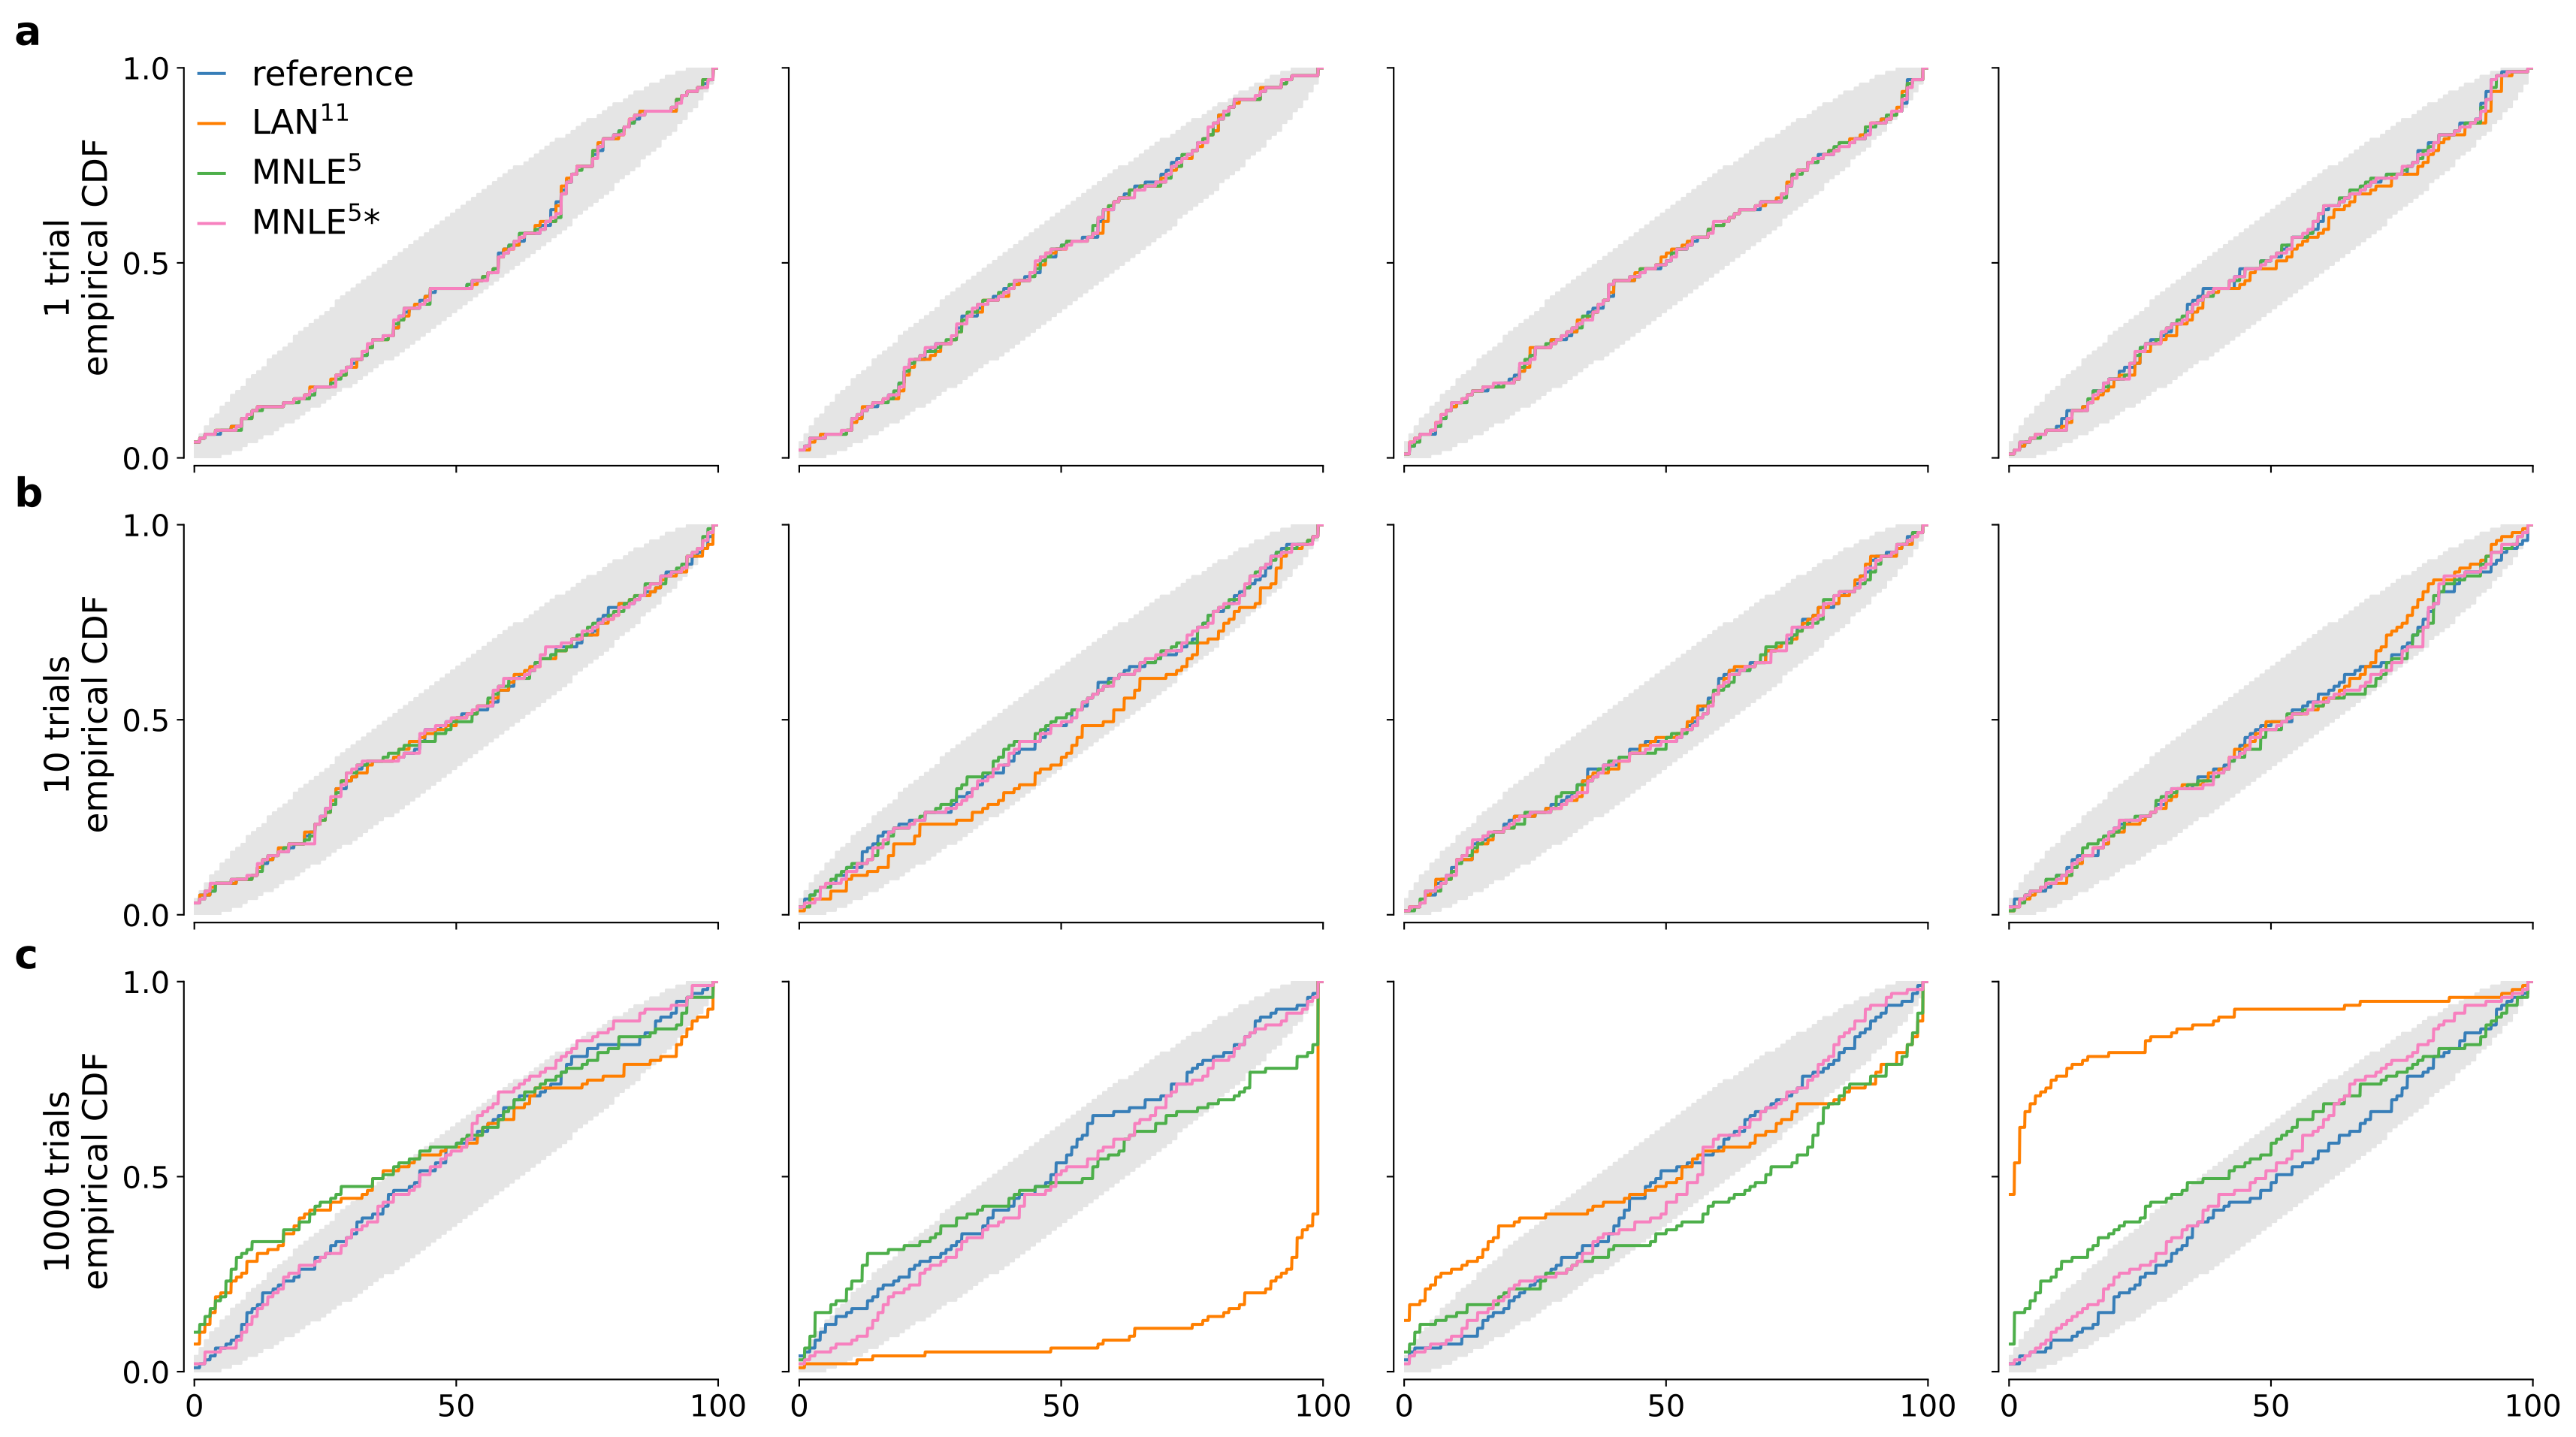

Supplement: supp [file elife_poa_e77220_Figure_4_figure_supplement_1.pdf › elife_poa_e77220_Figure_4_figure_supplement_1.pdf]

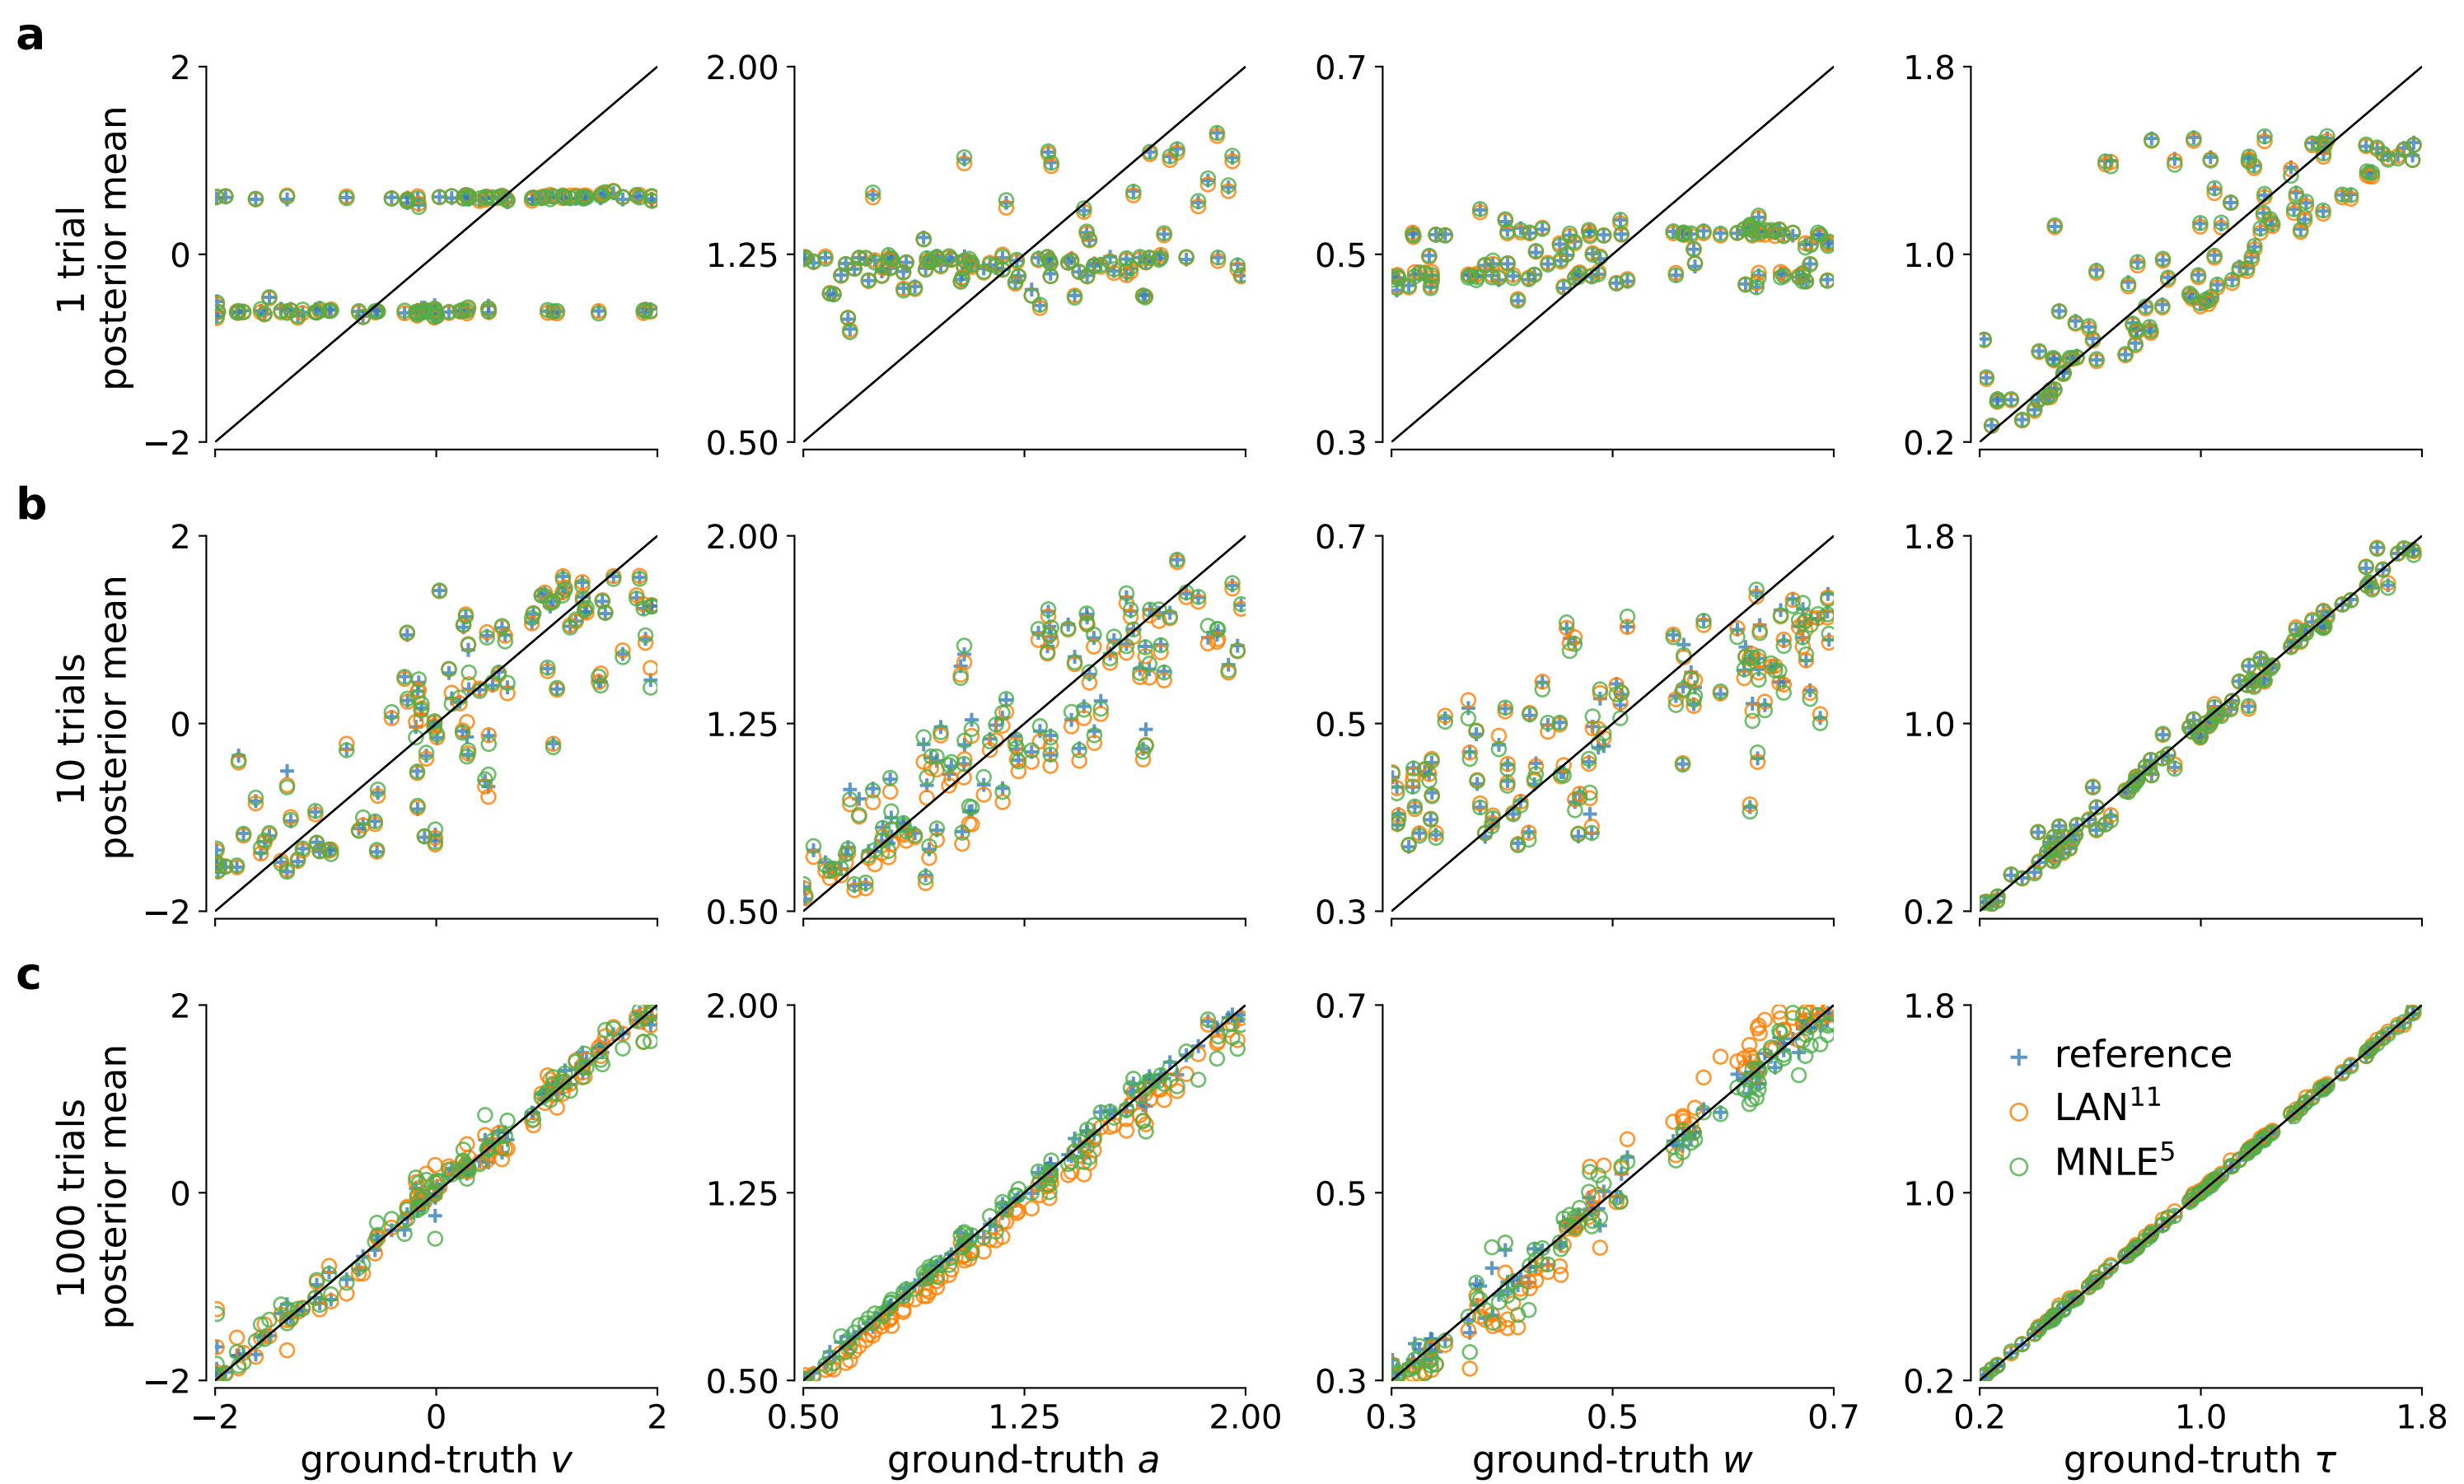

Supplement: supp [file elife_poa_e77220_Figure_4_figure_supplement_2.pdf › elife_poa_e77220_Figure_4_figure_supplement_2.pdf]
